# Supplementary material for: MgO Nanoparticle Modified Anode for Highly Efficient SnO2‐Based Planar Perovskite Solar Cells
Source: PubMed Central journal article supplement (PMC5604382; doi:10.1002/advs.201700031), 2017-05-02
Supplement: ADVS-4-na-s001.pdf [file ADVS-4-na-s001.pdf]

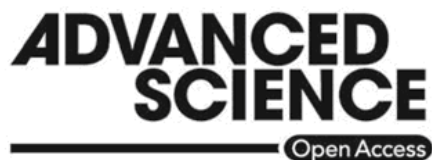

## Supporting Information

for *Adv. Sci.*, DOI: 10.1002/adv.201700031

**MgO Nanoparticle Modified Anode for Highly Efficient  
SnO<sub>2</sub>-Based Planar Perovskite Solar Cells**

*Junjie Ma, Guang Yang, Minchao Qin, Xiaolu Zheng,  
Hongwei Lei, Cong Chen, Zhiliang Chen, Yaxiong Guo,  
Hongwei Han, Xingzhong Zhao, and Guojia Fang\**

# MgO Nanoparticle Modified Anode for Highly Efficient SnO<sub>2</sub> Based Planar Perovskite Solar Cells

Junjie Ma,<sup>a</sup> Guang Yang,<sup>a</sup> Minchao Qin,<sup>a</sup> Xiaolu Zheng,<sup>a</sup> Hongwei Lei,<sup>a</sup> Cong Chen,<sup>a</sup> Zhiliang Chen,<sup>a</sup> Yaxiong Guo,<sup>a</sup> Hongwei Han,<sup>b</sup> Xingzhong Zhao<sup>a</sup> and Guojia Fang<sup>a\*</sup>

<sup>a</sup> Key Lab of Artificial Micro- and Nano-Structures of Ministry of Education of China, School of Physics and Technology, Wuhan University, Wuhan 430072, People's Republic of China

<sup>b</sup> Wuhan National Lab on Opto-electronics, Huazhong University of Science and Technology, Wuhan 430074, People's Republic of China

\*Corresponding Author. E-mail: gjfang@whu.edu.cn

**Table S1.** Photovoltaic parameters for the PSCs without and with different MgO films.

| Molarity (M)                    | $V_{oc}$ (V) | $J_{sc}$ (mA cm <sup>-2</sup> ) | FF   | PCE (%) |
|---------------------------------|--------------|---------------------------------|------|---------|
| Pure FTO                        | 1.06         | 15.11                           | 0.56 | 9.12    |
| FTO/0.045- MgO                  | 1.09         | 16.51                           | 0.61 | 11.03   |
| FTO/SnO <sub>2</sub>            | 1.07         | 21.56                           | 0.67 | 15.45   |
| FTO/0.015- MgO/SnO <sub>2</sub> | 1.08         | 22.23                           | 0.71 | 17.04   |
| FTO/0.045- MgO/SnO <sub>2</sub> | 1.09         | 22.59                           | 0.72 | 17.72   |

|                                  |      |       |      |       |
|----------------------------------|------|-------|------|-------|
| FTO/0.060- MgO /SnO <sub>2</sub> | 1.06 | 21.74 | 0.72 | 16.59 |
|----------------------------------|------|-------|------|-------|

**Table S2.** The average photovoltaic parameters of PSCs on FTO without and with 0.045-MgO nanolayer.

|             | V <sub>oc</sub> (V) | J <sub>sc</sub> (mA cm <sup>-2</sup> ) | FF          | PCE (%)      |
|-------------|---------------------|----------------------------------------|-------------|--------------|
| Without MgO | 1.04 ± 0.04         | 21.48 ± 0.47                           | 0.69 ± 0.02 | 15.43 ± 1.20 |
| With MgO    | 1.07 ± 0.03         | 22.25 ± 1.03                           | 0.72 ± 0.01 | 17.08 ± 1.24 |

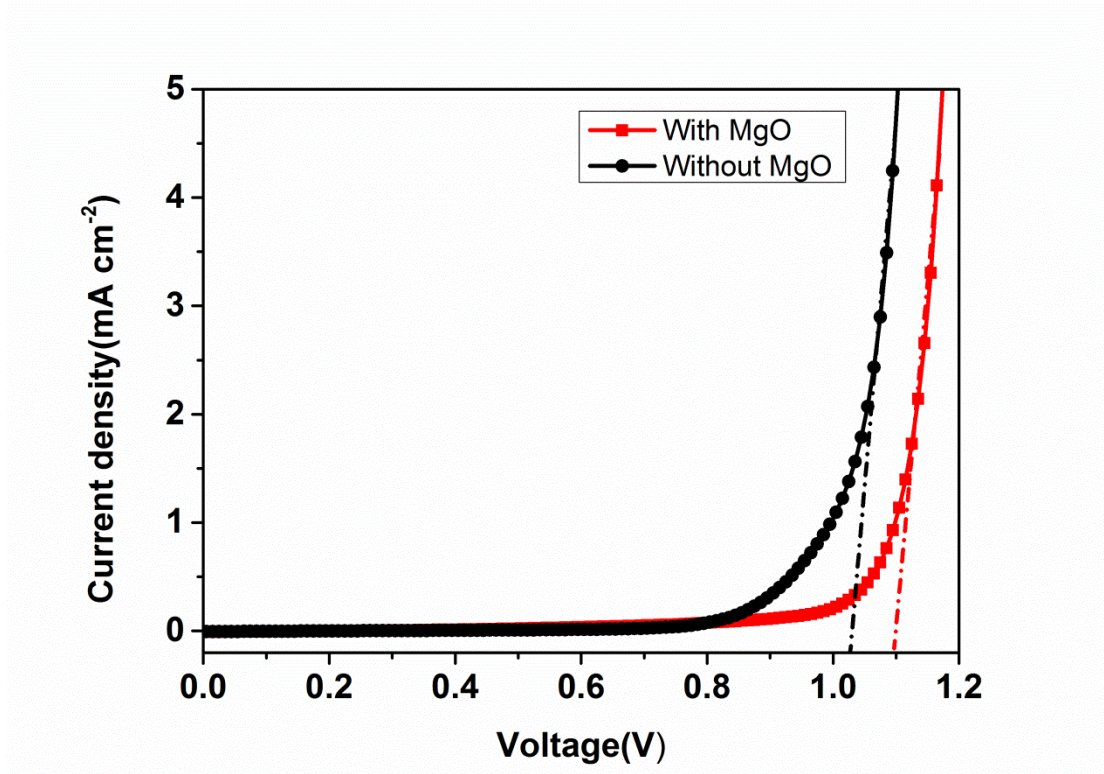

**Figure S1.** J-V curves of the PSCs without and without MgO films measured in the dark.

**Table S3.** the value of series resistance ( $R_s$ ), shunt resistance( $R_{sh}$ ) and ideality factor (A) of the perovskite solar cells with or without MgO HBL.

|             | $R_s(\Omega \text{ cm}^2)$ | $R_{sh}(\Omega \text{ cm}^2)$ | A    |
|-------------|----------------------------|-------------------------------|------|
| Without MgO | 2.21                       | 2272.72                       | 5.76 |
| With MgO    | 4.85                       | 4166.67                       | 2.69 |

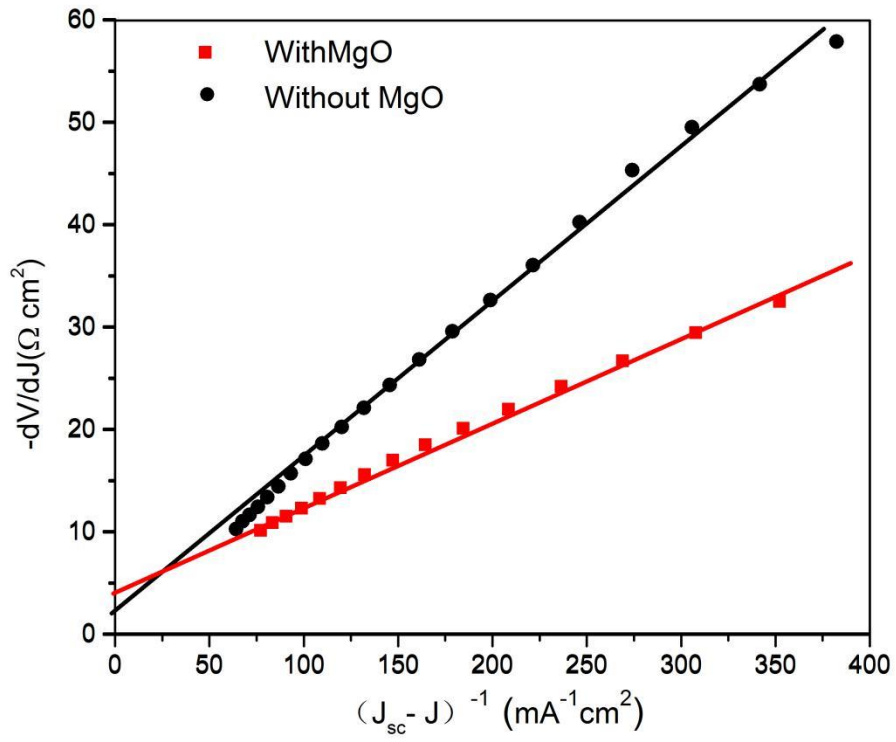

**Figure S2.** plots of  $-dV/dJ$  vs  $(J_{sc}-J)^{-1}$  and linear fitting curves of the PSCs based on the solar cells with or without MgO HBL under illumination.

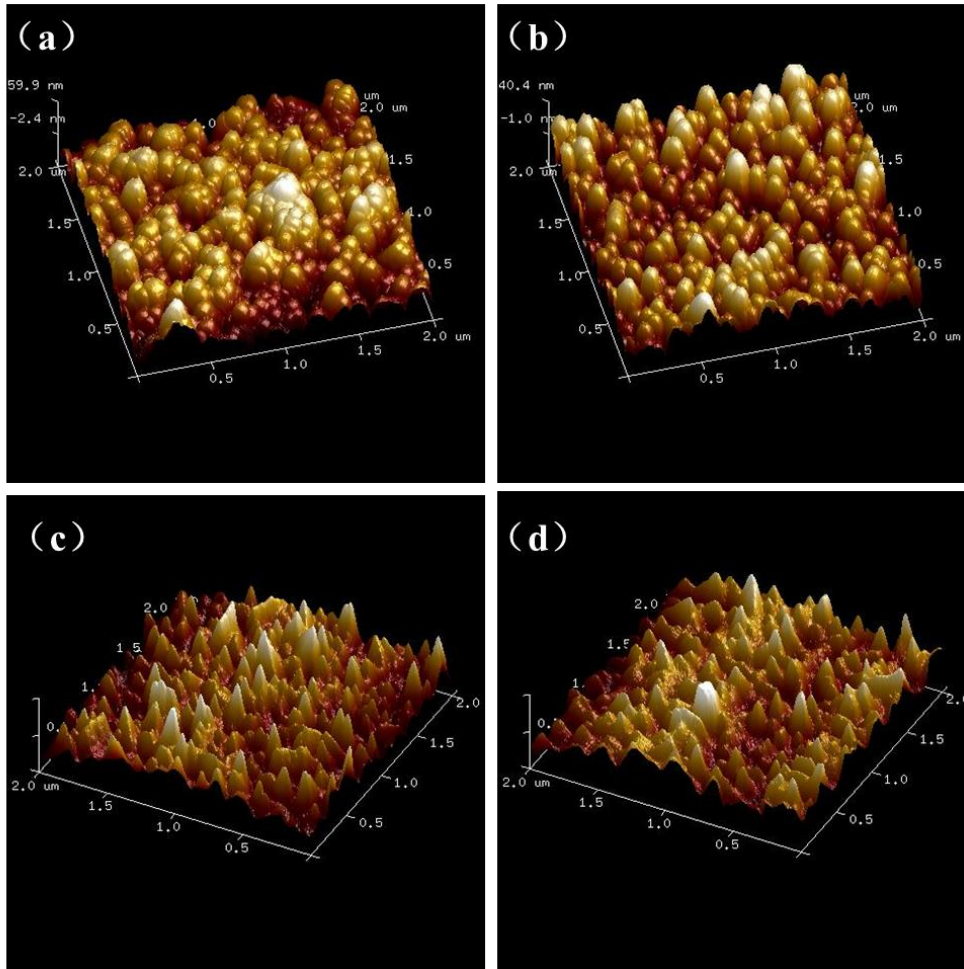

**Figure S3.** AFM image of a) bare FTO b) a FTO substrate coated with MgO c) a FTO substrate coated with SnO<sub>2</sub> d) FTO substrate coated with MgO/SnO<sub>2</sub>

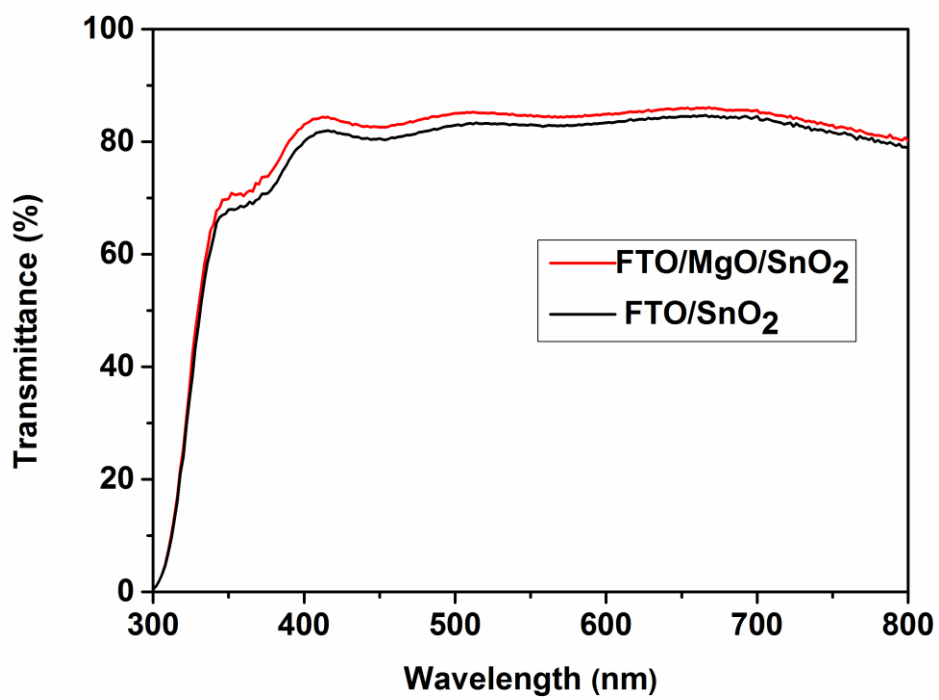

**Figure S4.** Transmittance spectra of FTO/SnO<sub>2</sub> and FTO/MgO/SnO<sub>2</sub>.

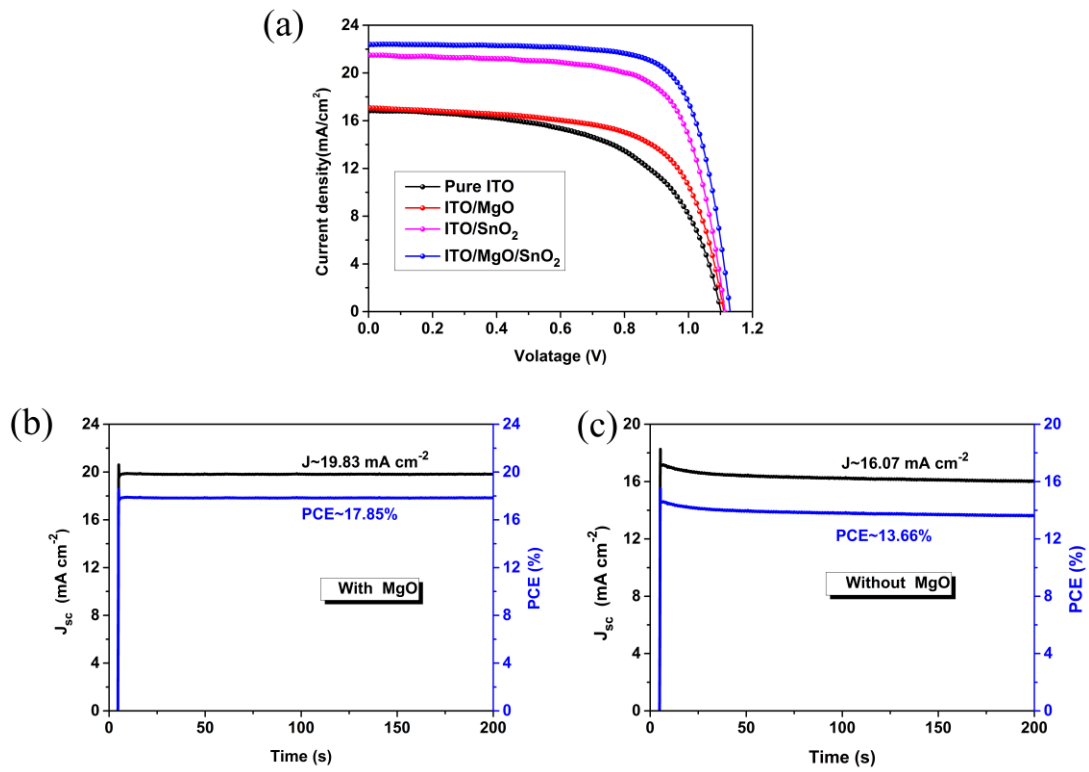

**Figure S5.** a) J-V curves of the PSCs without and with MgO films based on ITO anode. Steady-state efficiencies of the PSCs with SnO<sub>2</sub> ETL based on ITO anode. b) with and c) without a MgO HBL at a constant bias voltages of 0.90 V and 0.85 V, respectively.



**Table S4.** Photovoltaic parameters for the PSCs without and with MgO films based on ITO anode.

|                          | $V_{oc}$ (V) | $J_{sc}$ (mA cm <sup>-2</sup> ) | FF   | PCE (%) |
|--------------------------|--------------|---------------------------------|------|---------|
| Pure ITO                 | 1.10         | 16.84                           | 0.58 | 10.79   |
| ITO/ MgO                 | 1.12         | 17.07                           | 0.65 | 12.39   |
| ITO/SnO <sub>2</sub>     | 1.12         | 21.49                           | 0.71 | 16.92   |
| ITO/MgO/SnO <sub>2</sub> | 1.14         | 22.39                           | 0.74 | 18.82   |
